# Supplementary material
Source: PubMed Central journal article supplement (PMC2680916)
Supplement: NIHMS111129-supplement-table_1-supplement.pdf [file NIHMS111129-supplement-table_1-supplement.pdf]

| Patient ID | Chip # | Tumor | Grade | ER  | PR  | Her-2 | Clinical Status | Side | Ab          |
|------------|--------|-------|-------|-----|-----|-------|-----------------|------|-------------|
| 1092       | 8604   | IDC   | II    | pos | neg | neg   | Pre-RX          | L    | EpCAM       |
| 1092       | 8602   | IDC   | II    | pos | neg | neg   | Pre-RX          | R    | EpCAM       |
| 1092       | 9365   | IDC   | II    | pos | neg | neg   | Post-RX         | R    | EpCAM       |
| 2119       | 8094   | IDC   | III   | pos | pos | neg   | Pre-RX          | L    | EpCAM       |
| 2119       | 9342   | IDC   | III   | pos | pos | neg   | Post-RX         | L    | EpCAM       |
| 2119       | 9388   | IDC   | III   | pos | pos | neg   | Post-RX         | L    | No Ab       |
| 2119       | 9343   | IDC   | III   | pos | pos | neg   | Post-RX         | R    | EpCAM       |
| 2119       | 9361   | IDC   | III   | pos | pos | neg   | Post-RX         | R    | No Ab       |
| 2153       | 8601   | IDC   | III   | neg | neg | neg   | Pre-RX          | L    | EpCAM       |
| 2153       | 9396   | IDC   | III   | neg | neg | neg   | Post-RX         | L    | EpCAM       |
| 2153       | 9374   | IDC   | III   | neg | neg | neg   | Post-RX         | R    | EpCAM       |
| 2428       | 9390   | IDC   | II    | neg | neg | neg   | Post-RX         | L    | No Ab       |
| 2428       | 9354   | IDC   | II    | neg | neg | neg   | Post-RX         | R    | No Ab       |
| 2490       | 8095   | ILC   | II    | pos | pos | neg   | 1 Year          | L    | EpCAM       |
| 2661       | 8097   | IDC   | III   | pos | pos | pos   | Post-RX         | NS   | EpCAM       |
| 3264       | 8369   | IDC   | II    | pos | pos | neg   | 16 mo.          | NS   | EpCAM       |
| 3422       | 9386   | IMC   | I     | pos | pos | neg   | Pre-RX          | L    | No Ab       |
| 3422       | 9367   | IMC   | I     | pos | pos | neg   | Pre-RX          | L    | EpCAM       |
| 3422       | 9382   | IMC   | I     | pos | pos | neg   | Pre-RX          | R    | EpCAM       |
| 4351       | 9350   | IDC   | III   | neg | neg | neg   | 1 Year          | L    | EpCAM       |
| 4351       | 9356   | IDC   | III   | neg | neg | neg   | 1 Year          | L    | No Ab       |
| 4351       | 9351   | IDC   | III   | neg | neg | neg   | 1 Year          | R    | EpCAM       |
| 4351       | 9355   | IDC   | III   | neg | neg | neg   | 1 Year          | R    | No Ab       |
| 4472       | 8368   | IDC   | III   | neg | neg | neg   | 1 Year          | R    | EpCAM       |
| 4627       | 9344   | IDC   | III   | pos | pos | neg   | Post-RX         | L    | EpCAM       |
| 4627       | 9362   | IDC   | III   | pos | pos | neg   | Post-RX         | L    | No Ab       |
| 4627       | 9345   | IDC   | III   | pos | pos | neg   | Post-RX         | R    | EpCAM       |
| 4627       | 9363   | IDC   | III   | pos | pos | neg   | Post-RX         | R    | No Ab       |
| 5019       | 8584   | IDC   | II    | pos | pos | pos   | Post-RX         | L    | CXCR4       |
| 5019       | 8618   | IDC   | II    | pos | pos | pos   | Post-RX         | L    | Osteopontin |
| 5019       | 8619   | IDC   | II    | pos | pos | pos   | Post-RX         | L    | ABCG2       |
| 5019       | 8620   | IDC   | II    | pos | pos | pos   | Post-RX         | L    | Sca-1       |
| 5019       | 8574   | IDC   | II    | pos | pos | pos   | Post-RX         | R    | EpCAM       |
| 5019       | 8575   | IDC   | II    | pos | pos | pos   | Post-RX         | R    | Osteopontin |
| 5019       | 8576   | IDC   | II    | pos | pos | pos   | Post-RX         | R    | Sca-1       |
| 5019       | 8577   | IDC   | II    | pos | pos | pos   | Post-RX         | R    | EMMPRIN     |
| 5019       | 8578   | IDC   | II    | pos | pos | pos   | Post-RX         | R    | ABCG2       |
| 5019       | 8579   | IDC   | II    | pos | pos | pos   | Post-RX         | R    | CXCR4       |
| 5019       | 8580   | IDC   | II    | pos | pos | pos   | Post-RX         | R    | CD44        |
| 5385       | 8603   | IDC   | III   | neg | neg | neg   | Pre-RX          | NS   | EpCAM       |
| 5385       | 9364   | IDC   | III   | neg | neg | neg   | Post-RX         | L    | EpCAM       |
| 5385       | 9397   | IDC   | III   | neg | neg | neg   | Post-RX         | R    | EpCAM       |
| 5775       | 8366   | IDC   | III   | pos | pos | neg   | Post-RX         | L    | EpCAM       |
| 5775       | 8367   | IDC   | III   | pos | pos | neg   | Post-RX         | R    | EpCAM       |
| 5839       | 8370   | IDC   | III   | pos | neg | neg   | Post-RX         | NS   | EpCAM       |
| 6268       | 8096   | IDC   | III   | neg | neg | pos   | Pre-RX          | L    | EpCAM       |
| 6268       | 8581   | IDC   | III   | neg | neg | pos   | Post-RX         | L    | EpCAM       |
| 6268       | 8582   | IDC   | III   | neg | neg | pos   | Post-RX         | L    | CXCR4       |

|       |      |     |     |     |     |     |           |    |             |
|-------|------|-----|-----|-----|-----|-----|-----------|----|-------------|
| 6268  | 8605 | IDC | III | neg | neg | pos | Post-RX   | L  | ABCG2       |
| 6268  | 8606 | IDC | III | neg | neg | pos | Post-RX   | L  | CD44        |
| 6268  | 8607 | IDC | III | neg | neg | pos | Post-RX   | L  | Sca-1       |
| 6268  | 8608 | IDC | III | neg | neg | pos | Post-RX   | L  | EMMPRIN     |
| 6268  | 8609 | IDC | III | neg | neg | pos | Post-RX   | L  | Osteopontin |
| 6268  | 8611 | IDC | III | neg | neg | pos | Post-RX   | R  | CD44        |
| 6268  | 8612 | IDC | III | neg | neg | pos | Post-RX   | R  | ABCG2       |
| 6268  | 8613 | IDC | III | neg | neg | pos | Post-RX   | R  | Osteopontin |
| 6268  | 8614 | IDC | III | neg | neg | pos | Post-RX   | R  | EMMPRIN     |
| 6268  | 8615 | IDC | III | neg | neg | pos | Post-RX   | R  | Sca-1       |
| 7118  | 9395 | IDC | III | neg | neg | neg | Post-RX   | L  | EpCAM       |
| 7118  | 9373 | IDC | III | neg | neg | neg | Post-RX   | R  | EpCAM       |
| 7207  | 8363 | ILC | II  | pos | pos | neg | 1 Year    | NS | EpCAM       |
| 7342  | 9394 | IDC | III | pos | pos | neg | 1 Year    | L  | EpCAM       |
| 7459  | 9357 | IDC | II  | pos | pos | neg | Post-RX   | L  | No Ab       |
| 7459  | 9366 | IDC | II  | pos | pos | neg | Post-RX   | L  | EpCAM       |
| 7459  | 9358 | IDC | II  | pos | pos | neg | Post-RX   | R  | No Ab       |
| 7459  | 9385 | IDC | II  | pos | pos | neg | Post-RX   | R  | EpCAM       |
| 7506  | 9368 | IDC | II  | pos | pos | pos | Post-RX   | L  | EpCAM       |
| 7506  | 9387 | IDC | II  | pos | pos | pos | Post-RX   | L  | No Ab       |
| 7506  | 9360 | IDC | II  | pos | pos | pos | Post-RX   | R  | No Ab       |
| 7506  | 9384 | IDC | II  | pos | pos | pos | Post-RX   | R  | EpCAM       |
| 8024  | 9346 | IDC | II  | pos | pos | neg | Post-RX   | L  | EpCAM       |
| 8024  | 9389 | IDC | II  | pos | pos | neg | Post-RX   | L  | No Ab       |
| 9131  | 9391 | IDC | II  | pos | pos | neg | Pre-RX    | L  | EpCAM       |
| 9290  | 8098 | IDC | II  | pos | pos | neg | Pre-RX    | L  | EpCAM       |
| 9290  | 9369 | IDC | II  | pos | pos | neg | Post-RX   | L  | No Ab       |
| 9290  | 9383 | IDC | II  | pos | pos | neg | Post-RX   | R  | EpCAM       |
| 9290  | 9359 | IDC | II  | pos | pos | neg | Post-RX   | R  | No Ab       |
| 9843  | 8364 | ILC | I   | pos | pos | neg | 1 Year    | L  | EpCAM       |
| 9843  | 8365 | ILC | I   | pos | pos | neg | 1 Year    | R  | EpCAM       |
| 20616 | 9816 | na  | na  | na  | na  | na  | Normal BM | NS | No Ab       |
| 20616 | 9832 | na  | na  | na  | na  | na  | Normal BM | NS | No Ab       |
| 20617 | 9817 | na  | na  | na  | na  | na  | Normal BM | NS | No Ab       |
| 20881 | 9810 | na  | na  | na  | na  | na  | Normal BM | NS | EpCAM       |
| 20881 | 9813 | na  | na  | na  | na  | na  | Normal BM | NS | No Ab       |
| 20950 | 9811 | na  | na  | na  | na  | na  | Normal BM | NS | EpCAM       |
| 20950 | 9814 | na  | na  | na  | na  | na  | Normal BM | NS | No Ab       |
| 20951 | 9815 | na  | na  | na  | na  | na  | Normal BM | NS | No Ab       |

|  |
|--|
|  |
|  |
|  |
