# Supplementary material
Source: PubMed Central journal article supplement (PMC2680916)
Supplement: NIHMS111129-supplement-table_2_supplement.pdf [file NIHMS111129-supplement-table_2_supplement.pdf]

**Gene Symbol**

CRISP3  
S100P  
CEACAM6  
DEFA4  
NR2F1  
KCNJ15  
ENG  
CAMP  
MMP9  
MGAM  
IL8RA  
SLC2A10  
COL18A1  
ORM1  
EGFL7  
PITX2  
FGFR3  
SCARF1  
LCN2  
**GPR161**  
IGFBP4  
IL1R1  
APOE  
PRSS16  
PTGES  
GJA1  
TNFRSF10C  
PDGFRL  
PTPRN2  
PC  
THBS2  
SEPP1  
CEACAM8  
TFPI  
FCGR3B  
GNG11  
TCN1  
CLEC3B  
SYNPO  
PCK1  
CLC  
HSPB1  
G0S2  
KCNA1  
FLT1  
S100A3  
GPR109B  
UBE2M  
**TWIST1**  
LTF  
DUSP9  
NPM3

SIPA1  
FGF13  
TSPAN2  
GKN1  
PRV1  
ID1  
AKR1C2  
PDE5A  
TFF3  
APEX2  
**PIR**  
LEPR  
SLPI  
CA4  
**TACSTD1**

| Gene Name                                                                | Fold Difference |
|--------------------------------------------------------------------------|-----------------|
| cysteine-rich secretory protein 3                                        | 25.6            |
| S100 calcium binding protein P                                           | 17.9            |
| carcinoembryonic antigen-related cell adhesion molecule 6                | 16.4            |
| defensin, alpha 4, corticostatin                                         | 12.5            |
| nuclear receptor subfamily 2, group F, member 1                          | 11.9            |
| potassium inwardly-rectifying channel, subfamily J, member 15            | 11.8            |
| endoglin                                                                 | 11.7            |
| cathelicidin antimicrobial peptide                                       | 10.6            |
| matrix metalloproteinase 9                                               | 10.3            |
| maltase-glucoamylase                                                     | 10.2            |
| interleukin 8 receptor, alpha                                            | 10.1            |
| solute carrier family 2, member 10                                       | 9.1             |
| collagen, type XVIII, alpha 1                                            | 8.9             |
| orosomuroid 1                                                            | 8.9             |
| EGF-like-domain, multiple 7                                              | 8.8             |
| paired-like homeodomain transcription factor 2                           | 8.8             |
| fibroblast growth factor receptor 3                                      | 7.9             |
| scavenger receptor class F, member 1                                     | 7.8             |
| lipocalin 2                                                              | 7.8             |
| <b>G protein-coupled receptor 161</b>                                    | <b>7.7</b>      |
| insulin-like growth factor binding protein 4                             | 7.5             |
| interleukin 1 receptor, type I                                           | 7.4             |
| apolipoprotein E                                                         | 7.0             |
| serine protease 16                                                       | 6.7             |
| prostaglandin E synthase                                                 | 6.6             |
| Connexin 43                                                              | 6.6             |
| tumor necrosis factor receptor superfamily, member 10c                   | 6.5             |
| platelet-derived growth factor receptor-like                             | 6.3             |
| protein tyrosine phosphatase, receptor type, N polypeptide 2             | 6.2             |
| pyruvate carboxylase                                                     | 6.2             |
| thrombospondin 2                                                         | 6.2             |
| selenoprotein P, plasma, 1                                               | 6.1             |
| carcinoembryonic antigen-related cell adhesion molecule 8                | 6.1             |
| tissue factor pathway inhibitor                                          | 6.0             |
| Fc fragment of IgG, low affinity IIIb, receptor                          | 5.9             |
| guanine nucleotide binding protein, gamma 11                             | 5.9             |
| transcobalamin I                                                         | 5.9             |
| C-type lectin domain family 3, member B                                  | 5.8             |
| synaptopodin                                                             | 5.8             |
| phosphoenolpyruvate carboxykinase 1                                      | 5.6             |
| Charcot-Leyden crystal protein                                           | 5.6             |
| heat shock 27kDa protein 1                                               | 5.6             |
| putative lymphocyte G0/G1 switch gene                                    | 5.6             |
| potassium voltage-gated channel, shaker-related subfamily, beta member 1 | 5.5             |
| fms-related tyrosine kinase 1                                            | 5.5             |
| S100 calcium binding protein A3                                          | 5.5             |
| G protein-coupled receptor 109B                                          | 5.5             |
| ubiquitin-conjugating enzyme E2M                                         | 5.4             |
| <b>twist homolog 1</b>                                                   | <b>5.4</b>      |
| lactotransferrin                                                         | 5.4             |
| dual specificity phosphatase 9                                           | 5.4             |
| nucleophosmin/nucleoplasmin, 3                                           | 5.3             |

|                                                                        |     |
|------------------------------------------------------------------------|-----|
| signal-induced proliferation-associated gene 1                         | 5.3 |
| fibroblast growth factor 13                                            | 5.3 |
| tetraspan 2                                                            | 5.3 |
| gastrokine 1                                                           | 5.2 |
| polycythemia rubra vera 1                                              | 5.2 |
| inhibitor of DNA binding 1, dominant negative helix-loop-helix protein | 5.2 |
| aldo-keto reductase family 1, member C2                                | 5.2 |
| phosphodiesterase 5A, cGMP-specific                                    | 5.1 |
| trefoil factor 3                                                       | 5.1 |
| APEX nuclease 2                                                        | 5.1 |
| pirin (iron-binding nuclear protein)                                   | 5.0 |
| leptin receptor                                                        | 4.9 |
| secretory leukocyte protease inhibitor                                 | 4.8 |
| carbonic anhydrase IV                                                  | 4.8 |
| tumor-associated calcium signal transducer 1                           | 4.8 |

| q-value(%) | NL BM ? |
|------------|---------|
| 0.81       | Yes     |
| 1.51       | Yes     |
| 3.05       | Yes     |
| 4.42       | Yes     |
| 5.28       | No      |
| 1.51       | Yes     |
| 0.33       | Yes     |
| 2.55       | Yes     |
| 0.56       | Yes     |
| 2.12       | Yes     |
| 0.81       | Yes     |
| 0.81       | No      |
| 0.27       | Yes     |
| 1.74       | Yes     |
| 0.47       | No      |
| 1.74       | No      |
| 1.74       | Yes     |
| 3.63       | Yes     |
| 2.55       | Yes     |
| 0.00       | No      |
| 5.28       | No      |
| 3.63       | Yes     |
| 0.81       | Yes     |
| 4.42       | No      |
| 2.55       | Yes     |
| 5.28       | Yes     |
| 1.51       | Yes     |
| 3.63       | No      |
| 3.63       | No      |
| 1.74       | No      |
| 2.55       | No      |
| 4.42       | Yes     |
| 1.51       | Yes     |
| 4.42       | No      |
| 0.33       | Yes     |
| 3.63       | Yes     |
| 0.47       | Yes     |
| 5.28       | No      |
| 3.05       | No      |
| 4.42       | No      |
| 3.63       | Yes     |
| 3.05       | No      |
| 1.74       | Yes     |
| 4.42       | No      |
| 4.42       | No      |
| 3.63       | No      |
| 0.69       | Yes     |
| 4.42       | Yes     |
| 3.05       | No      |
| 0.56       | Yes     |
| 4.42       | No      |
| 4.42       | Yes     |

|      |     |
|------|-----|
| 4.42 | Yes |
| 3.63 | Yes |
| 3.63 | Yes |
| 2.55 | No  |
| 3.05 | Yes |
| 3.05 | Yes |
| 0.15 | No  |
| 4.42 | No  |
| 3.05 | Yes |
| 1.74 | Yes |
| 0.15 | No  |
| 1.74 | Yes |
| 2.12 | Yes |
| 1.74 | Yes |
| 0.30 | Yes |
